# Supplementary material for: Resistance Loss in Cemented Paste Backfill Pipelines: Effect of Inlet Velocity, Particle Mass Concentration, and Particle Size
Source: MDPI journal article supplement (doi:10.3390/ma15093339), 2022-05-06
Supplement: s1 [file s1]

*Supplementary materials*

# **Resistance loss in cemented paste backfill pipelines: effect of inlet velocity, viscosity, and particle size**

**Qiusong Chen <sup>1,2</sup>, Hailong Zhou <sup>1</sup>, Yunmin Wang <sup>1,2</sup>, Xiaoshuang Li <sup>3</sup>, Qinli Zhang <sup>1</sup>, Yan Feng <sup>1,\*</sup>  
and Chongchong Qi <sup>4</sup>,**

<sup>1</sup> School of Resources and Safety Engineering, Central South University, Changsha 410083, China; qiusong.chen@csu.edu.cn (Q.C.); 205512082@csu.edu.cn (H.Z.); wangyunmin@csu.edu.cn; zhangqinlicn@126.com (Q.Z.)

<sup>2</sup> Sinosteel Maanshan General Institute of Mining Research Co., Ltd, Maanshan 243000, China

<sup>3</sup> School of Civil Engineering, Shaoxing University, Shaoxing 312000, China; xsli2011@126.com

<sup>4</sup> State Key Laboratory of Safety and Health for Metal Mines, Maanshan 243000, China

\* Correspondence: yan.feng@csu.edu.cn

---

**Table S1.** Resistance losses at the bend and outlet pipe.

| (IV)<br>(m/s) | PMC | PZ<br>( $\mu\text{m}$ ) | P1(Pa) | P2(Pa) | RL of bend<br>(MPa/km) | RL of the<br>outlet pipe<br>(MPa/km) |
|---------------|-----|-------------------------|--------|--------|------------------------|--------------------------------------|
| 1.5           | 68% | 150                     | 7071.8 | 6723.6 | 0.492602233            | 0.33618                              |
|               |     | 500                     | 5530.8 | 5222.9 | 0.435589395            | 0.261145                             |
|               |     | 700                     | 3675.4 | 3421.2 | 0.359619436            | 0.17106                              |
|               |     | 1000                    | 863.71 | 667.32 | 0.277835016            | 0.033366                             |
|               | 70% | 150                     | 7445.2 | 7080.1 | 0.516510842            | 0.354005                             |
|               |     | 500                     | 6138   | 5804.5 | 0.471805987            | 0.290225                             |
|               |     | 700                     | 4300.6 | 4024.5 | 0.390601598            | 0.201225                             |
|               |     | 1000                    | 1356.7 | 1140.6 | 0.305718962            | 0.05703                              |
|               | 72% | 150                     | 7880.7 | 7495.8 | 0.544522112            | 0.37479                              |
|               |     | 500                     | 6818.5 | 6455.8 | 0.513115537            | 0.32279                              |
|               |     | 700                     | 5074.3 | 4772.8 | 0.426535247            | 0.23864                              |
|               |     | 1000                    | 2108.8 | 1867.3 | 0.341652611            | 0.093365                             |
|               | 74% | 150                     | 8411   | 8002.2 | 0.578333695            | 0.40011                              |
|               |     | 500                     | 7584.9 | 7189.7 | 0.559093631            | 0.359485                             |
|               |     | 700                     | 5957.5 | 5624.3 | 0.471381574            | 0.281215                             |
|               |     | 1000                    | 3049.5 | 2773.1 | 0.391026011            | 0.138655                             |
|               | 68% | 150                     | 11583  | 11005  | 0.81770273             | 0.55025                              |
|               |     | 500                     | 9995.9 | 9439.3 | 0.787427923            | 0.471965                             |
|               |     | 700                     | 7634.6 | 7167.5 | 0.660811324            | 0.358375                             |
|               |     | 1000                    | 3906.5 | 3520.8 | 0.54565388             | 0.17604                              |
|               | 70% | 150                     | 12177  | 11572  | 0.855899916            | 0.5786                               |
|               |     | 500                     | 10943  | 10349  | 0.8403381              | 0.51745                              |
|               |     | 700                     | 8644.3 | 8139.8 | 0.7137215              | 0.40699                              |
|               |     | 1000                    | 4871.4 | 4449.5 | 0.596866404            | 0.222475                             |
|               | 72% | 150                     | 12871  | 12234  | 0.901170656            | 0.6117                               |
|               |     | 500                     | 11979  | 11343  | 0.899755945            | 0.56715                              |
|               |     | 700                     | 9830.5 | 9279.1 | 0.780071428            | 0.463955                             |
|               |     | 1000                    | 6104.3 | 5643.4 | 0.652040118            | 0.28217                              |
| 2.0           | 74% | 150                     | 13701  | 13025  | 0.956344369            | 0.65125                              |
|               |     | 500                     | 13110  | 12427  | 0.966247343            | 0.62135                              |
|               |     | 700                     | 11167  | 10562  | 0.855899916            | 0.5281                               |
|               |     | 1000                    | 7579.4 | 7071.1 | 0.719097401            | 0.353555                             |
|               | 68% | 150                     | 17112  | 16251  | 1.218065831            | 0.81255                              |
|               |     | 500                     | 15572  | 14712  | 1.216651121            | 0.7356                               |
|               |     | 700                     | 12815  | 12040  | 1.096400719            | 0.602                                |
|               |     | 1000                    | 8332.4 | 7700   | 0.894662987            | 0.385                                |
|               | 70% | 150                     | 17972  | 17072  | 1.273239545            | 0.8536                               |
|               |     | 500                     | 16841  | 15929  | 1.290216072            | 0.79645                              |
|               |     | 700                     | 14273  | 13440  | 1.178453934            | 0.672                                |
|               |     | 1000                    | 9789.2 | 9105.3 | 0.967520583            | 0.455265                             |
|               | 72% | 150                     | 18974  | 18027  | 1.339730943            | 0.90135                              |
|               |     | 500                     | 18242  | 17272  | 1.372269287            | 0.8636                               |
|               |     | 700                     | 15949  | 15049  | 1.273239545            | 0.75245                              |
|               |     | 1000                    | 11575  | 10829  | 1.055374112            | 0.54145                              |
|               | 74% | 150                     | 20168  | 19165  | 1.418954737            | 0.95825                              |

|     |     |      |       |       |             |         |
|-----|-----|------|-------|-------|-------------|---------|
| 3.0 |     | 500  | 19854 | 18819 | 1.464225476 | 0.94095 |
|     |     | 700  | 17799 | 16827 | 1.375098708 | 0.84135 |
|     |     | 1000 | 13606 | 12791 | 1.152989143 | 0.63955 |
|     |     | 150  | 23992 | 22795 | 1.693408594 | 1.13975 |
|     | 68% | 500  | 22131 | 20921 | 1.711799832 | 1.04605 |
|     |     | 700  | 19194 | 18043 | 1.628331907 | 0.90215 |
|     |     | 1000 | 13872 | 12916 | 1.352463339 | 0.6458  |
|     |     | 150  | 24777 | 23528 | 1.766973546 | 1.1764  |
|     | 70% | 500  | 23788 | 22504 | 1.816488417 | 1.1252  |
|     |     | 700  | 21114 | 19881 | 1.744338176 | 0.99405 |
|     |     | 1000 | 15852 | 14831 | 1.444419528 | 0.74155 |
|     |     | 150  | 26596 | 25276 | 1.867417999 | 1.2638  |
|     | 72% | 500  | 26727 | 25211 | 2.144701278 | 1.26055 |
|     |     | 700  | 24619 | 23213 | 1.989083111 | 1.16065 |
|     |     | 1000 | 19430 | 18185 | 1.761314704 | 0.90925 |
|     |     | 150  | 27744 | 26357 | 1.962203609 | 1.31785 |
|     | 74% | 500  | 27728 | 26275 | 2.055574509 | 1.31375 |
|     |     | 700  | 25613 | 24205 | 1.991912532 | 1.21025 |
|     |     | 1000 | 20981 | 19761 | 1.725946938 | 0.98805 |

**Table S2.** orthogonal analysis.

| Sample              | IV (m/s)   | PMC (%)    | Factors   |                          |
|---------------------|------------|------------|-----------|--------------------------|
|                     |            |            | PS (um)   | Resistance loss (MPa/km) |
| 1                   | 1.5        | 68         | 150       | 0.336180                 |
| 2                   | 1.5        | 70         | 500       | 0.290225                 |
| 3                   | 1.5        | 72         | 700       | 0.238640                 |
| 4                   | 1.5        | 74         | 1000      | 0.138655                 |
| 5                   | 2.0        | 68         | 500       | 0.471965                 |
| 6                   | 2.0        | 70         | 700       | 0.40699                  |
| 7                   | 2.0        | 72         | 1000      | 0.282170                 |
| 8                   | 2.0        | 74         | 150       | 0.651250                 |
| 9                   | 2.5        | 68         | 700       | 0.602000                 |
| 10                  | 2.5        | 70         | 1000      | 0.455265                 |
| 11                  | 2.5        | 72         | 150       | 0.901350                 |
| 12                  | 2.5        | 74         | 500       | 0.940950                 |
| 13                  | 3.0        | 68         | 1000      | 0.645800                 |
| 14                  | 3.0        | 70         | 150       | 1.176400                 |
| 15                  | 3.0        | 72         | 500       | 1.260550                 |
| 16                  | 3.0        | 74         | 700       | 1.210250                 |
| K1                  | 0.250925   | 0.51398625 | 0.7662950 | -                        |
| K2                  | 0.45309375 | 0.5822200  | 0.7409225 | -                        |
| K3                  | 0.72489125 | 0.6706775  | 0.6144700 | -                        |
| K4                  | 1.0732500  | 0.7352763  | 0.3804725 | -                        |
| Range               | 0.822325   | 0.2212900  | 0.3858225 | -                        |
| Sensitivity ranking | 1          | 3          | 2         | -                        |

Note: K1, K2, K3, K4 : Mean of gradients for each study factor.
